# Supplementary material for: Understanding uncertainties in coastal sea level altimetry data: insights from a round robin analysis
Source: Copernicus journal article supplement (doi:10.5194/egusphere-2024-2449), 2024-08-22
Supplement: Supplementary file [file egusphere-2024-2449-CC1-supplement.pdf]

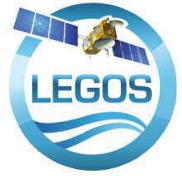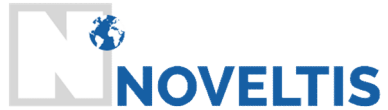

# Round Robin Assessment of altimetry algorithms for coastal Sea Surface Height data

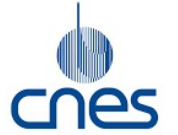

CENTRE NATIONAL D'ÉTUDES SPATIALES

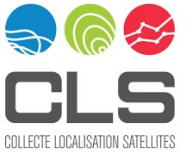

Florence Birol; François Bignalet-Cazalet; Mathilde Cancet; Jean-Alexis Daguze; Yannice Faugère; Wassim Fkaier; Ergane Fouchet; Fabien Léger; Claire Maraldi; Fernando Niño; Marie-Isabelle Pujol; Ngan Tran; Pierre Thibaut

Compare different algorithms used in the SSH computation and gain insights into their ability to contribute to obtaining quality data in the « coastal » band.

## Why?

1. Investigate which component (range, correction, MSSH) is the most limiting near the coast
2. Define a baseline for the generation of a new global coastal SLA product

OSTST 2022

# Specifications

- **Altimetry: LRM (focus on long time series)**
- **Variable : SLA**
- **Frequency: 20 Hz**
- **Missions: Jason-2 & Jason-3**
- **Period : 3 years for each mission (111 cycles)**
- **Zone: Global coastal ocean (0-200km) + regional.**  
**3 regions: Mediterranean Sea, NEA, Eastern Australia**

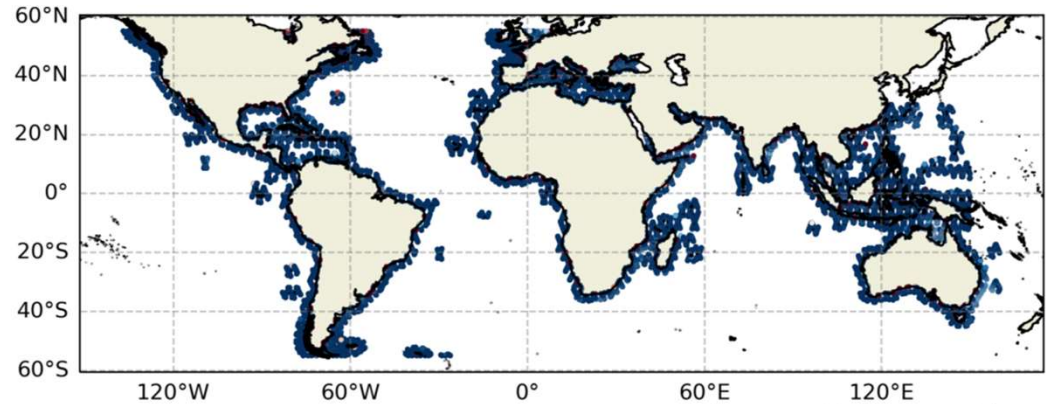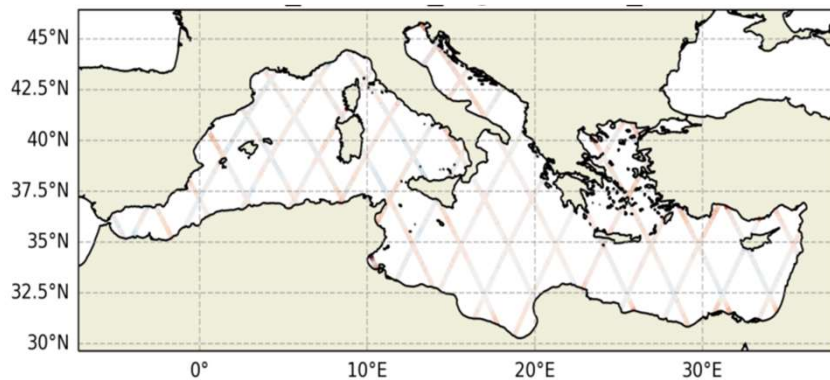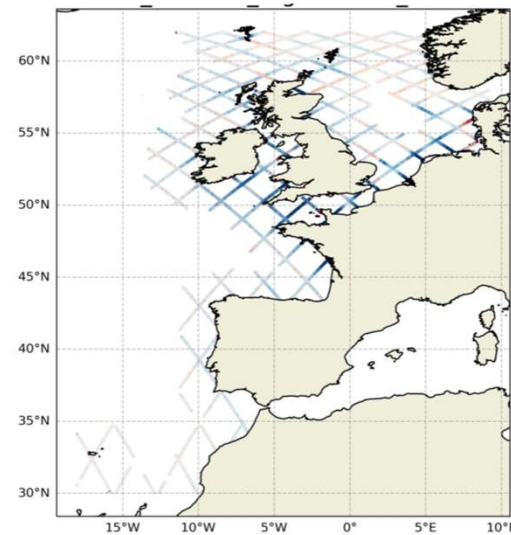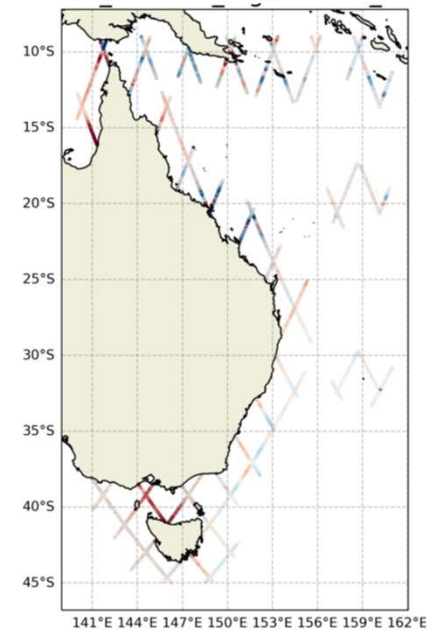

# Parameters considered

Selected because available at global scale for both Jason-2 & Jason-3 and over the period analysed

| SLA component                 | List of algorithms                                                                                                                       |               |
|-------------------------------|------------------------------------------------------------------------------------------------------------------------------------------|---------------|
| <b>Range</b>                  | <u>MLE4 (REF)</u> , Adaptive, ALES                                                                                                       | → 3 solutions |
| <b>Ionospheric correction</b> | <u>Dual frequency filtered (REF)</u> , GIM                                                                                               | → 2 solutions |
| <b>Wet tropo correction</b>   | <u>Radiometer (REF)</u> , ECMWF, GPD+                                                                                                    | → 3 solutions |
| <b>Ocean tide</b>             | DTU16, EOT20, <u>FES2014 (REF: regular grid, unstructured mesh)</u> , GOT4.10, TPX09, CNES Regional models (NEA, Med, Australia, Arctic) | → 6 solutions |
| <b>SSB</b>                    | <u>MLE4 2D 1Hz (REF)</u> , MLE4 20Hz, MLE4 3D 20Hz, Adaptive 2D 20Hz, Adaptive 3D 20Hz, solution ALES 20Hz                               | → 6 solutions |
| <b>MSSH</b>                   | <u>CNES15 (REF)</u> , SIO, CNES22                                                                                                        | → 3 solutions |

Reference: standards used today in the GDRs to compute the SSHA parameter, as well as in the L3/L4 SLA products

---

**Total: 22 algorithms tested**

# A framework for assessing performance

- **Intercomparison between the different algorithms for each SLA component**

Objective: for each algorithm, measure the internal consistency compared to the reference solution and its performance in terms of SLA data availability and SLA variance reduction, as a function of distance to the coast

Histograms, maps of MEAN and STD, % of data as a function of distance to the coast, MEAN and STD as a function of distance to the coast. GLOBAL + REGIONAL

- **External data comparison using in-situ measurements:**

Objective: use independent tide gauge data to measure the impact of each algorithm on the SLA calculation.

Statistics (correlation, RMSD), SLA data availability at local scale, Taylor diagrams. REGIONAL

- **Intercomparison between 2 altimetry missions:**

Objective: for each algorithm, measure the consistency of all the results between different altimetry missions

All the reports mentioned above

A specification document will be made freely available

# Results – wet tropo

## Analysis at global scale - Jason-2

### STD(wet) as a function of distance to the coast for the 3 solutions

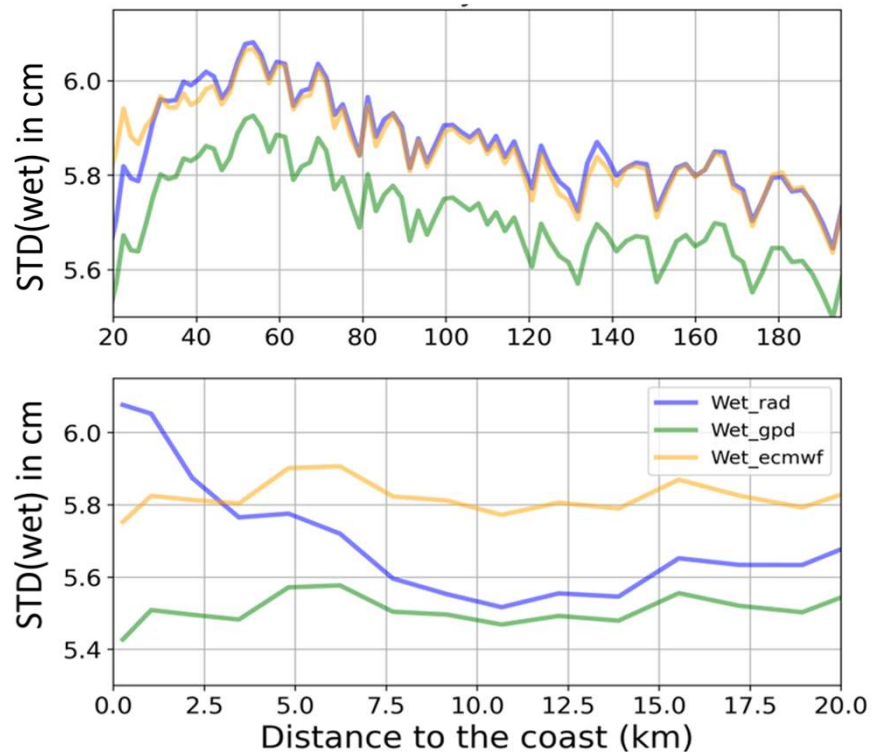

Same results for Jason-3

### STD(GPD) – STD(Rad) in cm

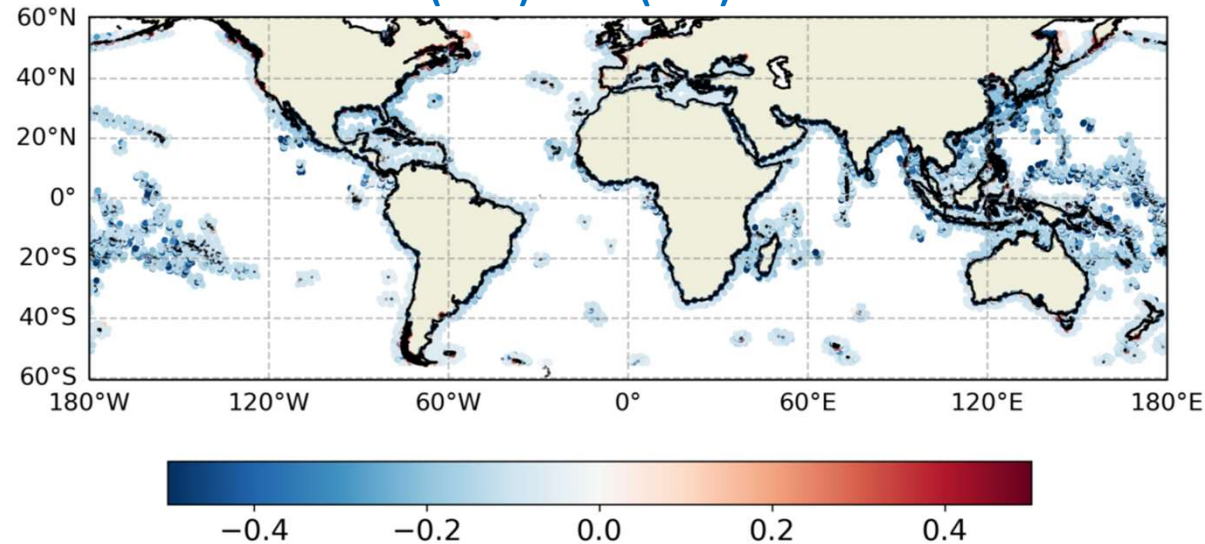

- STD: Differences between the 3 solutions < 0.3 cm
- Differences between RAD & GPD solutions very small up to 7-8 km to the coast

# Results – wet tropo

## Analysis at global scale - Jason-2

STD(SLA) = f(dist\_to\_coast)

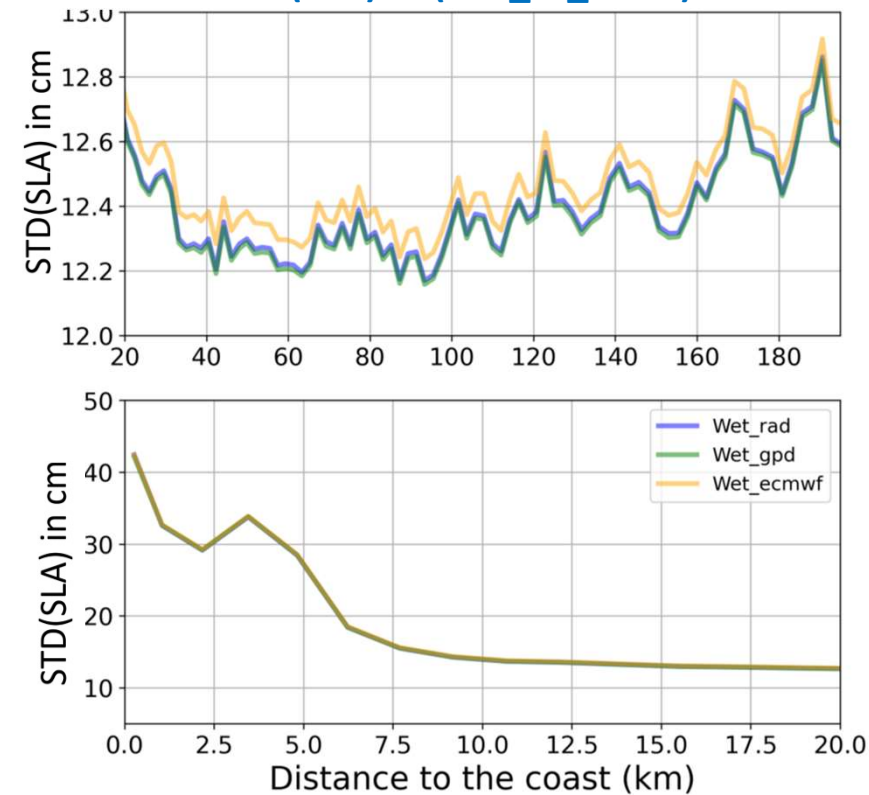

STD(SLA\_wet1) - STD(SLA\_wet2)

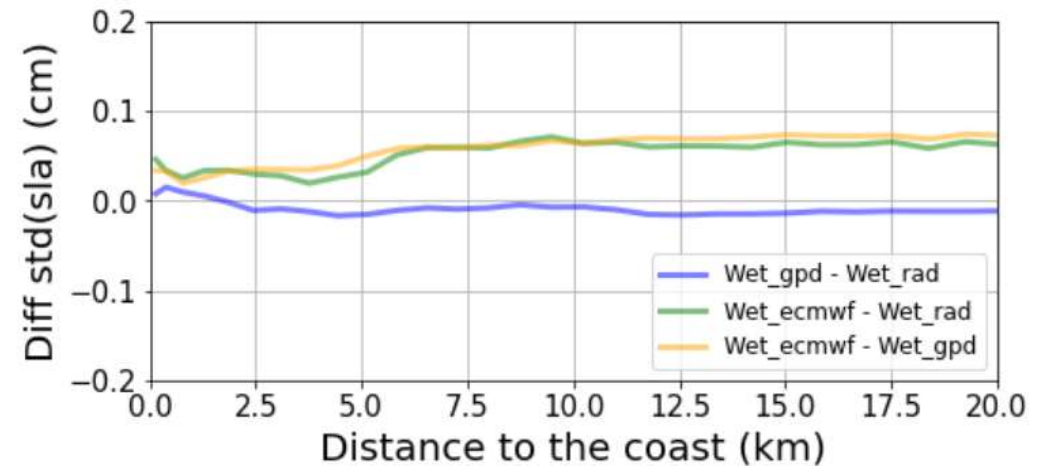

→ Impact on STD(SLA) < 0.1 cm near the coast at global scale, but can be slightly larger locally

R1: Concerning RAD, the results are highly related to the processing version  
R2: Impact on the long term SLA evolution not included in this RR exercise

# Results – ocean tide

## Analysis at regional scale - Jason-3

Example of the NEA region

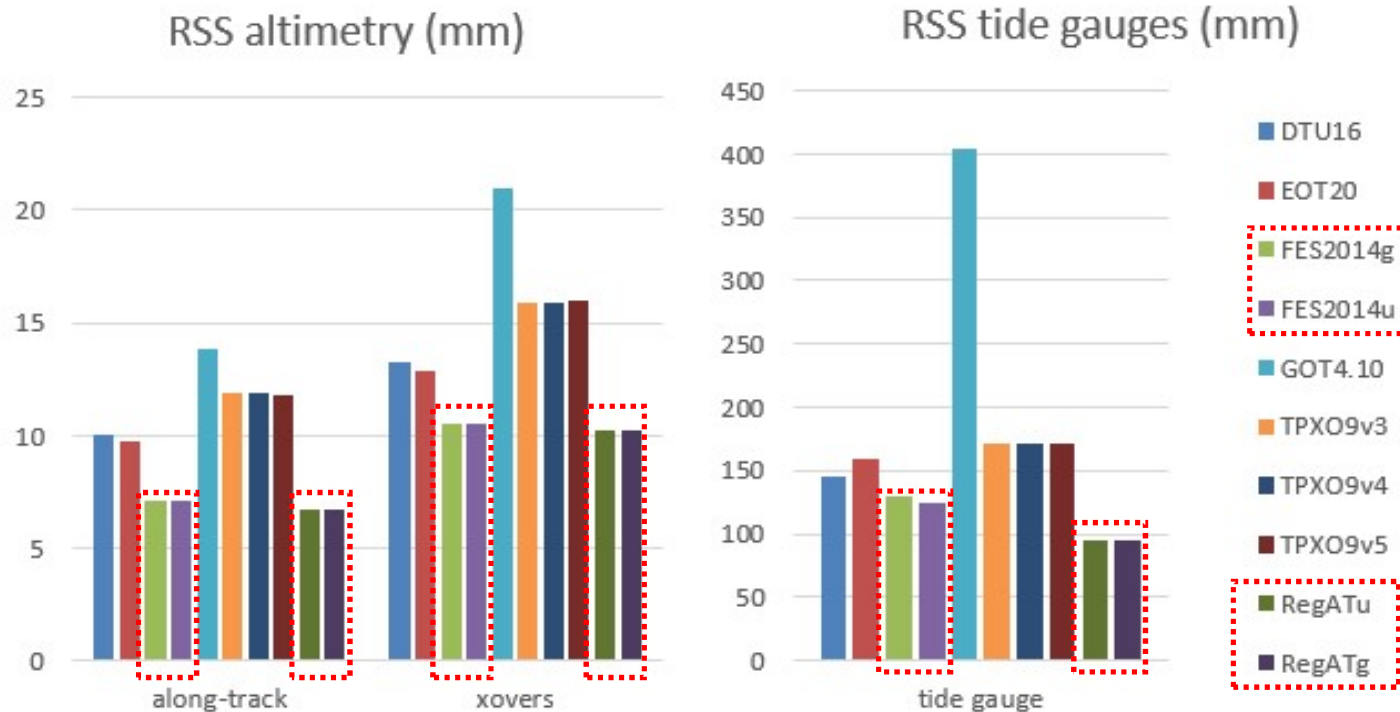

6 model families compared with tide gauge and altimetry, assessing **DAC compatibility** :

**DTU, EOT20, FES2014(g/u), GOT4.10, TPX09, RegAT(g/u)**

→ Best performance for FES2014 unstructured mesh + regional models

See also poster [COA2022\\_004](#)

*Residual Sum of Squares = sea level variance not explained by the ocean tidal model (REF: altimetry or TG)*

# Results – Range + SSB

## Analysis at global scale - Jason-3

Nb of SLA =  $f(\text{dist\_to\_coast})$

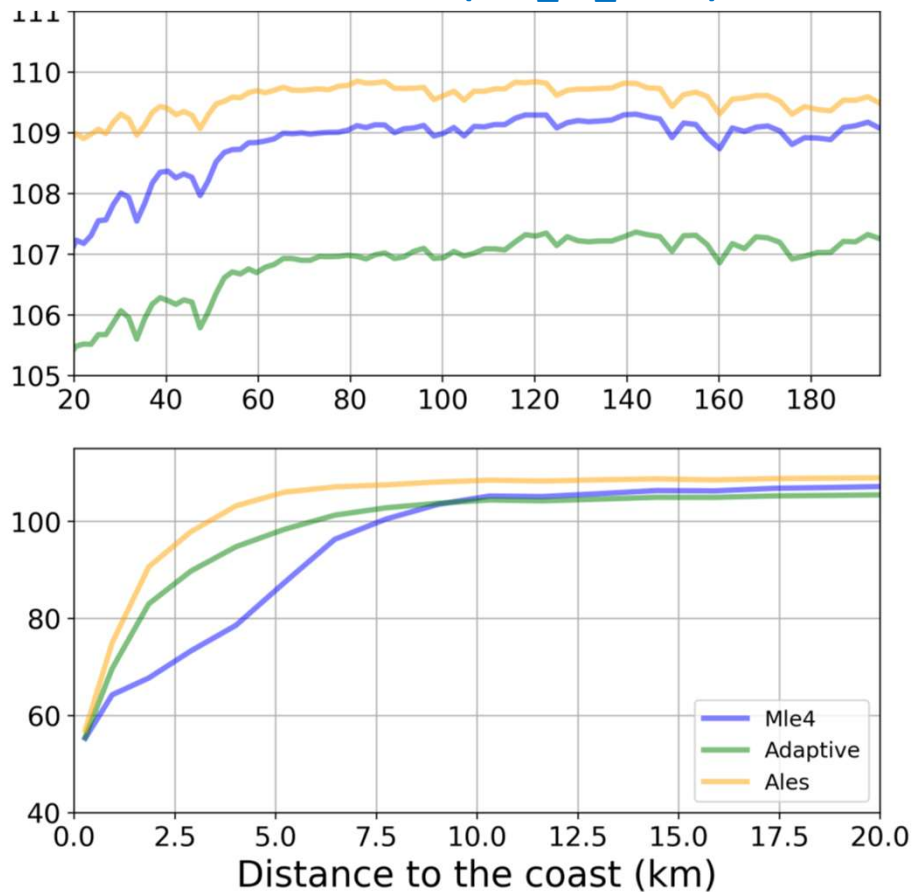

### SLA data availability

Total number of cycles : 111

- Compared to other retracers, MLE4 stalls at 10km to the coast
- Adaptive and ALES both recover significantly more data within 10 km of the coast
- In terms of number of coastal SLA data, ALES is the most efficient algorithm



# Results – Range + SSB

## Analysis at global scale - Jason-3

### SLA Variance reduction

$STD(SLA) = f(dist\_to\_coast)$

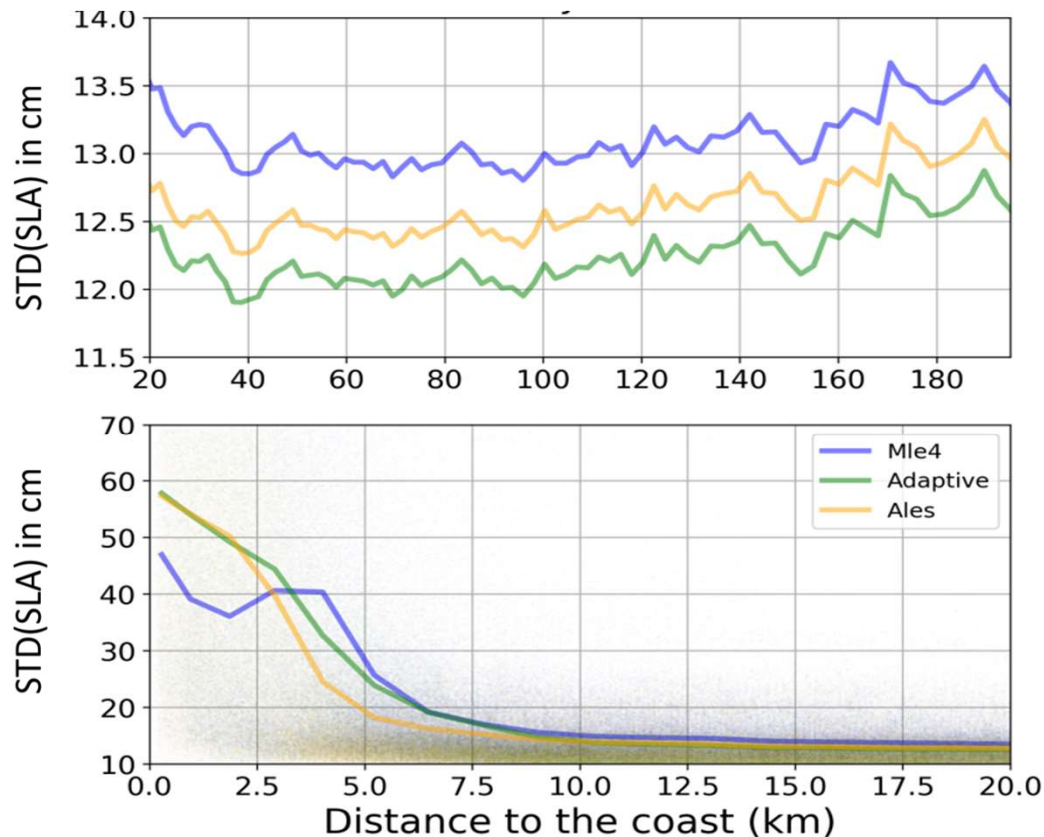

### Important remarks:

- the HFA correction (Adaptive) and its equivalent for ALES are not used in this study
- For each solution, the SSB used changes depending on the retracker (2D solutions used for MLE4 & Adaptive)

→ Differences observed: ~1.5 cm offshore, ~15 cm at 4 km

→ **15 km < dist < 200 km** : the adaptive retracker gives the lowest values in terms of STD(SLA)

→ **2 km < dist < 15 km** (if we forget MLE4 not significant because of data loss): the ALES retracker gives the lowest values in terms of STD(SLA)

→ ALES generally slightly better in terms of statistics at the tide gauges (not shown)

# Round Robin Results: summary

**Objective 1: Investigate which component is the most limiting near the coast**

Differences observed near the coast in terms of STD(SLA), according to the SLA component: **first analysis**

| SLA component                 | Difference Amplitude | Coastal zone with differences    | Comment                                                                    |
|-------------------------------|----------------------|----------------------------------|----------------------------------------------------------------------------|
| <b>Range</b>                  | 1-10 cm              | 10-15 km                         | Very important in the first 10 km, especially for MLE4                     |
|                               | ~1 cm                | 0-200 km                         | Impact also (but less) further offshore                                    |
| <b>Ionospheric correction</b> | 0.2 cm               | Not specific to the coastal zone | Dual frequency solution: loss of points due to filtering, especially on J3 |
| <b>Wet tropo correction</b>   | < 0.5 cm             | 7-8 km                           | For the radiometer, the result depends on processing versions              |
| <b>Ocean tide</b>             | < 5 cm               | 10 km                            | < 2 cm beyond 5 km<br>But results very heterogeneous spatially             |
| <b>SSB</b>                    | 1-15 cm              | 10-15 km                         | To be refined by removing impact of the retracker                          |
|                               | ~1 cm                | 0-200 km                         |                                                                            |
| <b>MSSH</b>                   | 0-5 cm               | ~30-50 km                        | Impact < 0.1 cm offshore and < 1 cm up to 7-8 km                           |

# Round Robin Results: summary

**Objective 1: Investigate which component is the most limiting near the coast**

Differences observed near the coast in terms of STD(SLA), according to the SLA component: **first analysis**

| SLA component                 | Difference Amplitude | Coastal zone with differences    | Comment                                                                    |
|-------------------------------|----------------------|----------------------------------|----------------------------------------------------------------------------|
| <b>Range</b>                  | 1-10 cm              | 10-15 km                         | Very important in the first 10 km, especially for MLE4                     |
|                               | ~1 cm                | 0-200 km                         | Impact also (but less) further offshore                                    |
| <b>Ionospheric correction</b> | 0.2 cm               | Not specific to the coastal zone | Dual frequency solution: loss of points due to filtering, especially on J3 |
| <b>Wet tropo correction</b>   | < 0.5 cm             | 7-8 km                           | For the radiometer, the result depends on processing versions              |
| <b>Ocean tide</b>             | < 5 cm               | 10 km                            | < 2 cm beyond 5 km<br>But results very heterogeneous spatially             |
| <b>SSB</b>                    | 1-15 cm              | 10-15 km                         | To be refined by removing impact of the retracker                          |
|                               | ~1 cm                | 0-200 km                         |                                                                            |
| <b>MSSH</b>                   | 0-5 cm               | ~30-50 km                        | Impact < 0.1 cm offshore and < 1 cm up to 7-8 km                           |

# Round Robin Results: summary

**Objective 2: Define a baseline for the generation of a new global coastal SLA product**

**Baseline selected considering algorithms available on J2&3 and results on the whole [0-200 km] coastal band**

| SLA component          | List of algorithms                                                                                                                                   |                        |
|------------------------|------------------------------------------------------------------------------------------------------------------------------------------------------|------------------------|
| Range                  | <u>MLE4</u> , <b>Adaptive</b> , ALES                                                                                                                 | → NEW                  |
| Ionospheric correction | <u>Dual frequency filtered</u> , <b>GIM</b>                                                                                                          | → NEW                  |
| Wet tropo correction   | <u>Radiometer</u> , ECMWF, <b>GPD+</b>                                                                                                               | → NEW                  |
| Ocean tide             | GOT4.10, <u>FES2014 regular grid</u> , <b>FES2014 unstructured mesh</b> , <b>CNES regional models (NEA, Med, Australia, Arctic)</b> , TPXO9v4, EOT20 | → NEW                  |
| SSB                    | <u>MLE4 2D 1Hz</u> , MLE4 20Hz, MLE4 3D 20Hz, <b>Adaptive 2D 20Hz</b> , Adaptive 3D 20Hz, solution ALES 20Hz                                         | → NEW                  |
| MSSH                   | <u>CNES15</u> , SIO, CNES22                                                                                                                          | → Still under analysis |

**Many changes!**

# Conclusion

- ❑ Still a bit of work to refine the analysis
- ❑ Numerous reporting tools available; a summary of the protocol and main results will be published soon.
- ❑ Many CNES/LEGOS/CLS/Noveltis exchanges of expertise in the technical and scientific domain... and now an established working group
- ❑ A new global product (L2P) covering the [0-500 km] coastal band and the Jason-3 mission planned for April 2023 (V1)
- ❑ Recommendations to space agencies in terms of studies to be funded (range, corrections)
- ❑ Next news at the Coastal Workshop

**All comments / questions /  
requests are welcome!!!**
